# Supplementary material for: Assessing the Feasibility of Using a Neural Network to Filter OCO-2 Retrievals at Northern High Latitudes
Source: Copernicus journal article supplement (doi:10.5194/amt-2021-145), 2021-07-19
Supplement: Supplementary file 1 [file nn_weights_standardization.xlsx]

## Sheet: w1
	0	1	2	3	4	5	6	7	8	9	10	11	12	13	14	15	16	17	18	19	20	21	22	23	24	25	26	27	28	29	30	31	32	33	34	35	36
Retrieval co2_grad_del	-0.00512226	0.450054	0.073399	0.0562645	0.923504	0.257375	0.0342403	0.217144	-0.0124258	0.00366147	-1.14164	0.00654545	-0.0978721	-0.0938797	-0.36796	-0.0106385	0.0169309	0.335903	0.5972	-0.0668715	0.159951	-0.0196623	-0.403169	-0.252949	-1.01148	0.235646	-0.0742928	0.00908661	-0.241915	-0.50479	-0.000809933	0.0473427	-0.269274	1.08164	-0.111642	1.17224	0.245698
Retrieval dpfrac	-0.0404351	1.06823	0.00166247	-0.0506545	2.07485	-0.199284	-0.0615099	0.551271	-0.017386	-0.256069	-0.159709	-0.00209847	-0.0375585	0.34898	-0.0630387	-0.106139	-0.134203	0.154166	0.473383	-1.35081	-0.133049	0.0562718	-0.66376	0.383127	-0.00762226	-0.0743533	-0.0575232	-0.00787727	-0.559114	0.530991	0.715766	-0.00128167	-0.532407	1.37356	0.0905037	1.34649	0.305783
Retrieval eof3_3_rel	-0.0157967	0.305371	0.0256134	0.0221654	-0.165068	0.389895	-0.13146	0.35858	-0.0253195	0.032506	-0.0382589	-0.0444652	-0.170427	-0.179575	0.0439371	0.0248384	-0.0158911	-0.0570065	0.0303068	-0.563675	-0.39614	0.178713	0.0586373	0.0193122	-0.274464	0.074171	0.105492	-0.000402372	0.407497	0.601794	0.300733	-0.0392405	-0.36115	0.113308	-0.382445	-0.0532113	-0.101686
Retrieval deltaT	0.0120162	0.877307	0.0493593	-0.0625182	0.691246	-0.0727529	0.222875	0.327593	-0.0379972	-0.485843	0.156554	0.0106417	-0.0640079	0.35521	-0.0293681	-0.00134051	-0.00984269	0.0889787	0.281992	-0.152614	0.757893	0.156148	-0.670373	-0.356302	0.548008	0.356099	-0.154035	0.00304308	0.469117	0.327683	0.0876904	0.0596545	-0.123928	0.186887	-0.229783	0.368584	-0.0718432
Retrieval h2o_scale	0.127412	-0.593763	0.0307057	-0.0618284	-0.0532792	0.541401	-0.0692814	0.352616	0.0100162	-0.0700396	-1.03645	-0.0109984	0.20617	-0.399247	0.0376129	-0.0126473	0.0658669	-0.214131	-0.40883	0.996625	0.526322	-0.202055	0.646227	0.252185	-0.298169	0.255252	-0.027716	-0.0350912	0.547019	-0.547904	-0.493349	-0.0603788	-0.568388	1.33907	-0.332658	-0.217083	0.0170933
Retrieval aod_oc	-0.0363511	-0.234971	-0.070095	0.0259384	-0.241908	-0.0968092	0.0107214	0.0170052	-0.0523261	-0.258064	-1.62546	0.0507358	-0.325394	-0.0192471	-0.0699325	0.0147067	-0.039905	-0.00279612	0.150715	-0.468336	-0.54505	-0.538087	0.298571	-0.00880158	-0.256888	-0.0792444	-0.214593	0.0710013	-0.500636	0.317277	0.0134345	0.0252213	-0.481929	0.151129	-0.288402	0.0414465	-0.00621531
Retrieval aod_water	-0.011464	-0.21342	-0.108453	-0.0672195	-0.226245	-0.0519512	-0.415452	0.0226317	-0.0604161	0.981378	-0.04218	-0.0682488	0.062161	-0.136571	-0.342296	-0.0554992	0.0412287	-0.0654276	-0.375172	-0.79143	-0.589229	-0.82011	0.639929	0.154758	0.0446936	0.0120859	-0.177777	-0.0567149	-0.37546	-0.186783	-0.100877	-0.0239508	-0.264309	-0.311362	-0.184421	0.110952	0.254435
Retrieval aod_dust	-0.138361	0.023085	0.0229247	0.0154915	-0.413268	-0.391009	-0.0751653	0.573903	-0.0558582	-0.211122	-0.123352	0.119893	-0.510996	0.390606	-0.258178	0.0486715	-0.116165	0.19926	0.497106	-0.213156	-0.157492	0.635346	0.760672	-0.477655	0.0813979	-0.2299	-0.0286815	0.0664111	0.117725	0.00593068	-0.128616	0.0111748	0.352827	0.184097	-0.33919	0.212812	-0.197038
Retrieval aod_bc	0.0113933	-0.340956	0.0393177	0.0841769	-0.174166	-0.433727	0.087868	0.188576	0.0327358	-1.38261	0.0289603	0.0574772	-0.380477	0.235375	-0.0169841	0.00357931	0.143859	0.134041	0.0879194	-0.621289	-0.107699	0.339249	0.0295491	0.11704	0.0380542	-0.066569	0.0568039	0.0988206	0.0849007	-0.537883	-0.0306391	-0.00207614	0.272162	-0.0879133	0.128037	-0.394143	-0.0805348
Retrieval aod_strataer	-0.0804242	0.262385	0.039527	0.077317	0.59432	0.0415162	-0.178698	0.309718	-0.00910132	-0.116614	0.549114	-0.0995071	-0.000611006	0.171595	0.207659	0.00924782	-0.0125153	0.123354	0.438208	0.0178212	0.260535	1.07683	-0.193704	-0.919507	-0.49139	-0.122479	0.166054	0.00862226	1.07347	-0.238761	0.272491	0.00967666	0.26115	-0.113162	-0.200263	-0.0555839	0.00288486
Retrieval aod_seasalt	-0.0866052	-0.140579	-0.074996	-0.0637713	-0.0316584	0.585843	-0.13746	0.245763	-0.0227077	0.5147	0.1581	0.0196552	-0.279685	0.178121	0.423214	-0.0487249	-0.0776514	-0.350561	-0.726341	-0.375836	-0.0872275	0.0877902	-0.0674282	-0.529566	-0.222296	0.397075	-0.221616	0.128987	-0.0194103	0.49845	0.103992	0.0198211	-0.0107365	0.187607	0.0517356	-0.321406	-0.185374
Retrieval aod_sulfate	0.0200094	0.652499	-0.00333415	-0.0862746	0.207108	0.536906	0.00583578	0.127835	0.00354498	-0.0555162	0.565822	0.0836081	-0.00398261	0.176201	-0.142062	-0.0379273	0.0460013	0.193798	0.0937927	-0.653101	-0.525714	-0.444214	-1.20669	-0.0727215	-1.09828	0.0155086	-0.239756	0.0116888	0.0981744	0.223126	0.170735	-0.0646389	-0.275232	-0.560273	-0.301532	0.0522822	0.175264
Retrieval aod_ice	-0.0211838	-0.322306	0.0153475	0.010548	-0.133825	0.190551	-0.0702233	0.609881	0.00410545	-0.107297	0.0102432	-0.0195919	-0.399469	0.55911	-0.0490196	-0.0247587	0.0250479	-0.0217337	0.138168	-0.522874	-0.434118	-0.306453	0.787492	-0.340578	-0.641087	-0.111375	-0.340487	0.0854767	-0.283771	-0.481108	0.243961	-0.0471684	-0.0176353	-1.04037	0.0996176	-0.0039951	-0.0666785
Retrieval water_height	-0.0618698	0.264628	0.0793438	0.138219	0.629144	0.0175116	-0.134517	0.291752	-0.00576457	0.39224	-1.32298	0.0714611	0.569561	-0.884429	0.532847	0.0900858	-0.0492806	-0.575054	0.689705	0.133181	0.677805	0.621009	-0.495775	-0.0535692	-0.185615	-0.174563	0.479513	0.0565058	-0.106172	-0.272474	0.415607	0.0368051	0.00500984	1.06142	0.0202687	0.425026	0.033485
Retrieval ice_height	-0.0711732	-0.432242	0.066693	0.00788581	0.18544	0.0409265	-0.387589	0.702038	-0.0750859	-0.182997	-0.164184	-0.0106049	0.222923	0.343594	-0.0779957	-0.0665769	-0.102345	0.103488	0.218057	-0.220799	-0.0318912	-1.23218	0.0674523	-0.425882	0.112751	-0.166084	0.0225181	-0.0853779	-0.453518	1.34579	0.28622	0.00823835	0.163902	0.572195	-0.171493	-0.0268039	0.0531125
Retrieval dust_height	-0.0104583	-0.0284536	0.00606908	0.0751501	0.0770192	-1.17138	0.153873	-0.0494722	0.0505609	-0.337032	-0.693681	-0.033308	0.354016	-0.33813	-0.413569	0.0734963	0.0125913	0.539914	-0.241747	-0.430063	0.438492	0.299995	0.334319	-0.468699	-0.843509	-0.0950394	0.221759	0.0440132	0.662287	0.332497	0.0836665	0.0441155	0.171478	-0.193102	0.25285	-0.440163	-0.164835
Retrieval albedo_wco2	-0.0194165	-0.287457	-0.0147135	0.0284678	0.605925	0.104753	-0.130535	-0.242757	0.0352747	-0.5326	-0.226171	-0.00765858	0.160531	0.217002	-0.0602297	0.0292936	-0.00647838	0.0726697	-0.410408	-0.290887	-0.244114	0.46686	0.450319	0.485256	0.606114	-0.182607	-0.0809887	0.0694702	0.409653	0.399668	-0.0864741	-0.0292673	-0.172708	0.183002	0.0639335	0.30817	-0.0216865
Retrieval albedo_slope_wco2	-0.025494	0.288304	-0.0395356	-0.0185377	-0.304884	-0.897907	0.200354	0.211528	-0.0147235	0.34865	0.10282	-0.0626357	-0.0801965	-0.164418	-0.0542101	-0.0543849	-0.0975843	0.121371	-0.310189	1.13332	-0.472515	-1.14594	0.578038	0.155686	-0.418862	0.0404166	0.102944	-0.0216681	0.245436	-0.72282	0.619764	0.0208091	0.40756	-0.516715	0.127161	-1.16905	0.0298964
Retrieval albedo_quad_wco2	-0.0114503	-0.265581	0.028844	0.0787615	0.178889	-0.67254	-0.156062	0.241537	0.000424076	0.413364	-0.324399	0.132955	-0.140803	0.148192	0.101493	0.0791276	-0.0399731	0.0280939	0.0778195	0.204523	0.400534	-0.115055	0.316246	-0.604305	0.266369	0.00872504	0.129422	0.035352	-0.221519	0.0317216	-0.616353	0.0192278	0.546505	-0.0962554	0.0182547	-0.0848162	-0.32781
Retrieval albedo_sco2	-0.13136	-0.283725	-0.0190997	-0.0397231	-0.299388	0.271929	-0.147333	-0.219787	-0.0710249	0.0466224	0.286393	-0.0413717	0.0715518	0.304249	-0.14753	0.0540026	-0.0681631	0.21484	-0.517471	-0.0421922	-0.511251	0.0689501	1.12527	0.537932	0.307958	-0.29822	-0.0351278	0.0257642	0.318695	0.265433	0.0797805	-0.0162454	-0.113857	-0.508399	-0.0362725	-0.960508	-0.0503744
Retrieval albedo_slope_sco2	0.149376	0.0826855	0.0545532	-0.049861	0.610664	0.185256	0.248234	-0.0357601	0.117231	0.0829346	0.0173399	-0.0266876	-0.015572	0.874018	0.0122769	-0.0572514	0.180144	-0.22334	0.246436	-0.00358171	0.191115	0.644148	-0.45987	-0.317103	0.0972618	0.384251	0.0824155	-0.0442342	0.237077	0.113423	0.135453	0.0358626	0.418116	1.27694	0.339353	0.778282	0.205122
Retrieval albedo_quad_sco2	-0.103423	-0.0357994	0.0464512	0.0357794	-0.140158	0.24625	0.0425111	-0.370916	0.00999921	-0.122935	0.469833	0.122487	-0.0642407	-0.694743	-0.0888544	0.0091076	-0.100956	0.135607	0.00576626	0.489894	-0.0358028	-0.20577	-0.104337	-0.209235	-0.588997	0.00357605	-0.0385191	-0.119689	0.386252	0.0299128	0.330098	-0.0116671	0.524314	-0.186306	0.1064	-0.994704	-0.18162
Retrieval albedo_o2a	-0.109682	-0.391993	0.0747638	0.169069	0.925146	0.00568819	-0.0561715	-0.192743	-0.0503497	0.253736	0.0984437	0.0620433	0.207586	-0.2675	-0.698568	0.124623	-0.0449088	0.73301	-0.355835	-0.145519	0.483844	-0.034547	0.0243378	0.290098	0.0647047	-0.282849	0.411822	0.117736	0.0836568	-0.425225	-0.0173316	0.0517485	-0.763404	-1.03032	-0.250455	0.964434	-0.19657
Retrieval albedo_slope_o2a	0.0187131	-0.308984	-0.00997319	-0.0319883	0.16213	0.0971388	0.0884845	0.0847136	0.00982615	0.0855429	-0.828001	-0.0131751	0.219147	0.410684	-0.0402674	-0.0972697	0.035269	-0.00390832	-0.139219	0.133818	0.169852	-0.693081	0.176615	-0.133146	-0.400053	0.102745	0.000660673	0.0231202	-0.228361	-0.171538	0.281613	0.0552816	0.233412	-0.00922181	-0.000244369	0.557261	0.126277
Retrieval albedo_quad_o2a	-0.0628292	0.00565187	0.0564081	0.0684393	0.14412	0.140199	-0.147962	0.212903	-0.0142465	0.17389	-0.4118	0.078849	-0.0698863	0.291697	-0.0970636	0.102977	-0.0131935	0.0763551	-0.0271849	0.250851	0.263785	-0.115992	0.279362	-0.0566157	-0.446446	0.0987782	0.136574	-0.00225172	-0.0187705	-0.052509	-0.622476	-0.00862501	-0.0227758	0.0315898	0.164122	0.370181	-0.189358
Retrieval rms_rel_o2a	-0.0106346	0.0217546	0.0793558	0.01382	0.103992	0.418628	0.0881378	-0.108054	-0.015348	-1.1184	-0.317747	0.03371	0.145678	-0.0652578	0.150455	-0.0340643	-0.0155827	-0.143732	-0.00758767	0.00906998	-0.210196	-0.00395036	1.08903	0.192801	-0.60886	-0.0546885	0.0231028	-0.111006	-0.397643	-0.250091	0.115078	-0.0458166	0.228106	0.477881	0.0192653	0.233711	0.0967938
Retrieval rms_rel_wco2	-0.0713523	0.0480078	0.00601909	0.060712	0.124727	-0.278784	-0.045645	0.364976	0.0586012	0.430703	0.0332799	0.00220484	-0.0602236	-0.172206	0.279154	-0.00630034	-0.124272	-0.0366241	-0.367887	-1.09011	-0.40594	0.152242	0.774786	-0.386094	0.0500553	-0.186871	0.227362	0.0185636	-0.689069	0.171978	-0.119617	-0.0101772	-0.143	-0.460406	0.0189018	-0.32317	-0.00288943
Retrieval rms_rel_sco2	-0.0362075	0.907977	-0.0111635	-0.0195202	-0.124389	1.12276	0.021385	0.500726	0.0207854	0.765864	0.202404	0.0216823	0.136871	-0.416647	0.173652	-0.017119	0.0162507	0.144544	-0.54164	-0.518787	-0.247064	0.453992	-0.0423882	-0.581301	-0.141438	0.180426	0.352349	0.0159324	0.189026	0.261666	0.327588	-0.0160356	0.189029	-0.134768	0.146337	0.099506	0.0248584
Sounding altitude_stddev	-0.019433	-0.348715	0.0176089	-0.00382461	0.134376	1.26506	-0.0245163	-0.565925	-0.049712	1.70672	-0.847338	-0.00957688	-0.817638	0.112422	0.0800433	0.00785664	-0.0260788	-0.24601	-1.71256	-0.426289	0.239327	-0.650139	0.71579	-0.399806	0.699175	-0.00167455	-0.259476	0.118728	0.284466	0.147704	-0.169308	0.00895268	-0.239031	-0.251363	-0.0192789	0.243748	0.248379
Preprocessors max_declocking_sco2	0.0190468	0.233328	0.0183905	-0.0489442	-0.278041	-0.0657437	0.00596005	-0.737119	-0.0486074	-0.139263	-0.585285	0.022901	-0.512728	0.0441224	-0.266664	-0.000755362	0.0408424	0.129015	-0.808703	-1.22009	-0.536449	-0.362584	-0.0478053	0.430612	0.0929672	0.0390266	-0.288158	-0.0184637	-0.0199127	-0.165034	0.167223	-0.0146148	-0.614847	-0.329708	-0.0675884	0.358043	-0.0215628
Preprocessors max_declocking_o2a	0.0135269	0.00920024	0.0296996	0.0246696	0.435087	-0.20315	-0.19725	0.0843518	-0.0289286	-0.120245	0.169806	0.0778176	-0.458028	-0.192209	0.133007	0.0211174	0.0727211	-0.0740458	-0.118487	0.227249	-0.0519709	-0.0524021	0.186622	-0.286676	0.222672	-0.379335	0.0772502	-0.0218423	-0.3942	0.221756	-0.312518	0.0301409	0.15854	0.147743	-0.0325504	-0.343109	-0.141475
Preprocessors max_declocking_wco2	-0.0424946	-0.229355	0.0158164	-0.0173277	0.297374	0.160364	-0.216813	0.0183643	-0.0542212	0.0295415	-0.0117295	0.0448447	-0.363386	0.534676	-0.115533	0.00867166	0.0235967	0.000834318	0.151419	-0.26725	-0.518354	-0.397743	-0.0123982	0.158603	-0.309583	-0.228976	-0.27618	0.00256745	-0.315431	0.323732	-0.177136	-0.0339849	-0.394368	-0.0331705	-0.183076	-0.142731	-0.0264617
Preprocessors co2_ratio	-0.0769659	0.0413604	-0.021058	-0.0116616	0.725699	0.37079	-0.158434	0.101346	-0.0106796	0.49457	0.826565	0.0539351	-0.299374	0.679334	-0.263824	0.0180627	-0.0873314	0.306355	-0.583293	-0.24202	-0.361657	-0.0719278	0.265527	-0.00273961	-0.108989	-0.124896	-0.119135	0.049203	0.247467	0.290632	0.0472231	-0.0602596	0.730244	-0.133727	0.0372459	-0.588643	-0.15232
Preprocessors h2o_ratio	0.0784752	-0.175999	-0.0633939	0.00398782	-0.447444	0.455929	0.236014	-0.699594	0.0101102	0.100196	0.052491	-0.0298328	-0.0750373	0.0643754	0.460923	-0.0567175	-0.00221262	-0.0937564	0.0938583	0.0191481	-0.0949168	-0.382801	0.710665	-0.227776	0.178199	-0.0231701	-0.229041	-0.000997368	-0.0430937	0.233652	-0.328498	-0.0296941	0.0815323	-1.08117	0.164339	-0.15509	0.157834
solar_zenith_angle	0.0215578	-0.582252	-0.130884	6.69123e-05	0.632835	1.83501	0.0522682	-1.63903	0.0126568	-0.481064	-0.470446	-0.0517193	0.331191	0.473552	0.0591717	0.0300267	0.0188923	0.0713755	-0.176441	-0.166861	-0.458747	0.545279	0.183513	0.204539	-0.812282	-0.219011	-0.0201254	-0.0568504	0.932667	-1.5217	-0.414524	0.00980952	-0.115352	-0.544926	-0.156605	-0.250317	-0.0285538
sensor_zenith_angle	-0.0310524	0.819148	-0.016486	-0.132539	0.0541627	-0.356895	0.116641	-0.303636	0.022105	0.689441	0.291562	-0.0135445	-0.398316	-1.06614	0.18266	-0.050247	-0.0589031	-0.253812	0.358483	-0.0216487	-0.504128	-1.11318	0.203822	0.874794	-0.00415323	-0.409951	-0.326933	0.0257169	-0.8926	-0.635065	0.03008	-0.0189197	0.551212	0.0306368	0.155706	0.686304	0.0573774

## Sheet: w2
	0
0	-0.292524
1	2.10308
2	0.172381
3	0.309175
4	-4.51023
5	2.77207
6	-0.735961
7	-2.34779
8	-0.110271
9	2.66676
10	3.05182
11	0.255665
12	1.41806
13	2.3044
14	-1.15008
15	0.27041
16	-0.236548
17	1.37881
18	2.34354
19	-2.4121
20	1.96577
21	-2.24254
22	2.9222
23	-1.86052
24	2.15469
25	-1.1156
26	0.995805
27	0.247007
28	-1.90565
29	-3.01624
30	1.56165
31	0.0904719
32	-1.99883
33	3.25988
34	-0.861553
35	-3.72015
36	-0.772948

## Sheet: b1
	0
0	0.076257
1	-0.3991
2	-1.12908
3	0.179756
4	3.14856
5	1.91633
6	-0.359171
7	0.540115
8	-0.674311
9	2.18603
10	-1.59579
11	-1.63185
12	-0.234019
13	1.3094
14	-0.883959
15	-0.985373
16	0.151841
17	0.855976
18	0.524672
19	-0.100676
20	-0.384554
21	-0.773695
22	-0.751666
23	-0.787622
24	-1.39162
25	0.568006
26	0.279563
27	-1.89525
28	0.3984
29	1.38227
30	-0.602922
31	-1.83432
32	-1.11988
33	-1.22219
34	-0.70517
35	2.11865
36	0.673496

## Sheet: b2
	0
0	-0.163939

## Sheet: Standardize values
	mean	std
Retrieval co2_grad_del	-1.68052	41.8258
Retrieval dpfrac	-1.26627	2.40398
Retrieval eof3_3_rel	-0.237573	0.122928
Retrieval deltaT	0.463688	0.312991
Retrieval h2o_scale	0.935999	0.112832
Retrieval aod_oc	0.00731	0.0222061
Retrieval aod_water	0.0138704	0.0306204
Retrieval aod_dust	0.0196243	0.0201512
Retrieval aod_bc	0.000319342	0.00238247
Retrieval aod_strataer	0.0070349	0.00517838
Retrieval aod_seasalt	0.000753678	0.00428705
Retrieval aod_sulfate	0.0233479	0.0294623
Retrieval aod_ice	0.00861552	0.0167042
Retrieval water_height	0.914969	0.249718
Retrieval ice_height	0.197489	0.183867
Retrieval dust_height	0.769427	0.455444
Retrieval albedo_wco2	0.169687	0.0754891
Retrieval albedo_slope_wco2	-9.76554e-05	4.89286e-05
Retrieval albedo_quad_wco2	-1.41725e-07	2.52585e-07
Retrieval albedo_sco2	0.0905186	0.0592622
Retrieval albedo_slope_sco2	-2.87224e-05	9.12313e-05
Retrieval albedo_quad_sco2	3.38442e-07	9.40147e-07
Retrieval albedo_o2a	0.269238	0.158953
Retrieval albedo_slope_o2a	-9.51184e-06	3.97853e-05
Retrieval albedo_quad_o2a	-5.49876e-08	1.03152e-07
Retrieval rms_rel_o2a	0.21831	0.163227
Retrieval rms_rel_wco2	0.243502	0.107621
Retrieval rms_rel_sco2	0.427963	0.216846
Sounding altitude_stddev	16.5348	27.1687
Preprocessors max_declocking_sco2	0.647233	0.60877
Preprocessors max_declocking_o2a	0.351191	0.324236
Preprocessors max_declocking_wco2	0.396499	0.442006
Preprocessors co2_ratio	1.0201	0.00844974
Preprocessors h2o_ratio	0.96186	0.0852622
solar_zenith_angle	49.2229	13.1478
sensor_zenith_angle	18.4649	19.3261
